# Supplementary material
Source: publisher figshare collection journal article supplement (https://acs.figshare.com/ndownloader/files/14535101)
Supplement: Supplementary file 1 [file 14535101]

## Supporting Information

### Facile Fabrication of NiO Decorated Double-Layer SWCNTs

#### Buckypaper for Glucose Detection

*Tianxiang Zhu<sup>1, 2</sup>, Yifan Zhang<sup>1, 2</sup>, Liqiang Luo<sup>\*\*</sup>,<sup>3</sup>, Xinluo Zhao<sup>\*</sup>,<sup>1, 2</sup>*

<sup>1</sup>Department of Physics, Shanghai University, Shanghai 200444, China

<sup>2</sup>Institute of Low-dimensional Carbons and Device Physics, Shanghai University, Shanghai 200444, China

<sup>3</sup>Department of Chemistry, Shanghai University, Shanghai 200444, China

\*Tel.: +86-21-66136916, Fax: +86-21-66134208, E-mail address: xlzhao@shu.edu.cn.

\*\*E-mail address: luck@shu.edu.cn.

## XPS spectra

XPS analysis was done for the O 1s region of 2 samples: as-prepared NiO-BP (a-NiO) and NiO-BP soaked in 0.4 M NaOH (b-NiO). After being calibrated by setting the C 1s peak to 284.8 eV, the O 1s spectra were subtracted using a Shirley-type background. For each spectrum, the area ratio of the component peaks at 529.3, 531.1 and 532.8 eV from NiO was fixed at 69:29:2 (20% Lorentzian-80% Gaussian) following the article by Biesinger et al.<sup>1</sup> As shown in Figure S1 and Table S1, hydroxide peak at 531.3 eV can be observed for both samples and the relative area of this peak is larger for b-NiO. The result reveals that the surface of NiO nanoparticles on buckypaper was converted to Ni(OH)<sub>2</sub> when they were dispersed in water during the fabrication process and they were further hydroxylated in NaOH solution.

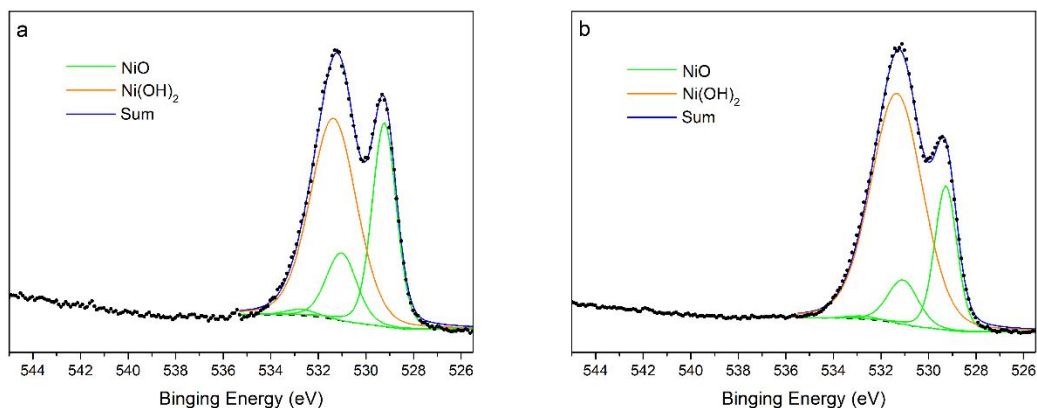

**Figure S1.** XPS spectra of the O 1s region for (a) a-NiO and (b) b-NiO.

**Table S1.** Spectral fitting parameters of O 1s.

| Sampl | Peak 1 | % area | Peak 2 | % area | Peak 3 | % area | Peak 4 | % area |
|-------|--------|--------|--------|--------|--------|--------|--------|--------|
| e     | (eV)   |        | (eV)   |        | (eV)   |        | (eV)   |        |
| a-NiO | 529.3  | 29.8   | 531.1  | 12.5   | 531.3  | 56.6   | 532.8  | 1.1    |
| b-NiO |        | 19.4   |        | 8.1    |        | 71.9   |        | 0.6    |

## FTIR absorption spectra

The electrooxidation product of glucose was dried under vacuum and characterized by FTIR. C=O stretching vibration modes from gluconate and glucolactone are observed at  $1635\text{ cm}^{-1}$  and  $1729\text{ cm}^{-1}$ , respectively. Positions of both peaks are consistent with the spectra recorded in Spectral Database for Organic Compounds (SDBS Nos. 2567 and 2533), indicating that glucose was finally oxidized into glucolactone/gluconate.

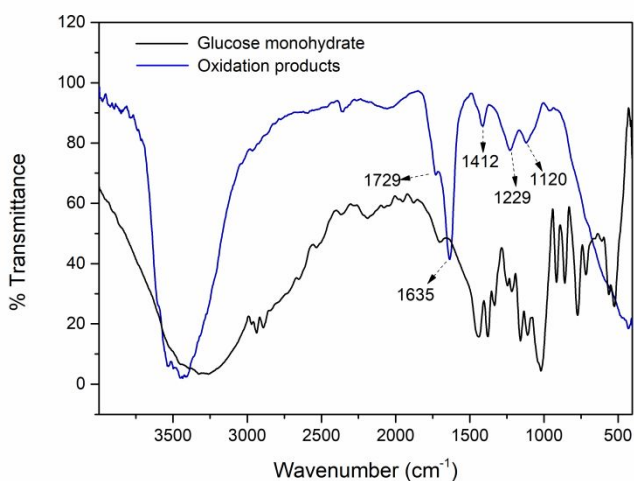

**Figure S2.** FTIR absorption spectra of glucose and its oxidation products.

**Table S2.** Peak assignments for the FTIR absorption spectrum of glucose oxidation products.

| Peak position<br>( $\text{cm}^{-1}$ ) | Vibration Mode                           | Assignment             |
|---------------------------------------|------------------------------------------|------------------------|
| 1635                                  | $\nu_{\text{C}=\text{O}}(-\text{COO}^-)$ | gluconate              |
| 1729                                  | $\nu_{\text{C}=\text{O}}(-\text{COO}-)$  | glucolactone           |
| 1120, 1229                            | $\nu_{\text{CO}}$                        | glucolactone/gluconate |
| 1412                                  | $\delta_{\text{OH}}$                     | glucolactone/gluconate |
| 3300–3600                             | $\nu_{\text{OH}}$                        | glucolactone/gluconate |

**Reference:**

(1) Biesinger, M. C.; Payne, B. P.; Grosvenor, A. P.; Lau, L. W.; Gerson, A. R.; Smart, R. S. C. Resolving Surface Chemical States in XPS Analysis of First Row Transition Metals, Oxides and Hydroxides: Cr, Mn, Fe, Co and Ni. *Appl. Surf. Sci.* **2011**, *257*, 2717-2730.
